# Supplementary material
Source: publisher figshare collection journal article supplement (https://springernature.figshare.com/ndownloader/files/13901549)
Supplement: Supplementary file [file 13901549]

## **ADDITIONAL FILE 3: Data Extraction Items**

### **1. Study Characteristics**

- a. Setting
- b. Study Design
- c. Sample Size
- d. Duration of follow-up/surveillance period
- e. Type of control
- f. Methods and intervention details
- g. Measurement techniques
- h. Measurement time points

### **2. Potential risk factors**

- a. Occupation
- b. Duration of service/participation/deployments
- c. Demographic, Anthropometric, and Biological
  - i. Sex
  - ii. Age
  - iii. Race
  - iv. Height
  - v. Somatotype
  - vi. Body composition (fat mass, lean mass, fat percentage, body mass index)
  - vii. Bone composition (density, mass)
- d. Workload
  - i. Running mileage
  - ii. Dosage and timing of activity exposure
  - iii. Load carriage magnitude and frequency
  - iv. Footwear
- e. Personal History
  - i. Physical activity
  - ii. Previous injury
  - iii. Smoking
  - iv. Medication use
  - v. Vitamin D physiology
  - vi. Sleep quality/quantity
  - vii. Mental/behavioral health
- f. Physical Fitness
  - i. Aerobic capacity
  - ii. Anaerobic capacity

- iii. Flexibility
- iv. Maximal voluntary dynamic or isometric muscular strength
- v. Maximal muscular power
- vi. Movement Screen (e.g. FMS)
- vii. Muscular Endurance

**3. Risk factor class**

- a. Extrinsic modifiable, extrinsic non-modifiable, intrinsic modifiable, intrinsic non-modifiable

**4. Outcomes**

- a. Injury characteristics
  - i. Definition
  - ii. Structure(s) or location(s)
  - iii. Disorder(s)
  - iv. Classification (e.g. overuse vs. acute)

**5. Primary study conclusions**

**6. Suggested mechanisms to explain relationship risk factors and injury**

**7. Potential confounds**

**8. Items to complete the following checklists:**

- a. Quality in Prognostic Studies (QUIPS) instrument
- b. Grading of Recommendations Assessment, Development, and Evaluation (GRADE)
